# Supplementary material for: Identification of Bioactive Phytochemicals from Six Plants: Mechanistic Insights into the Inhibition of Rumen Protozoa, Ammoniagenesis, and α-Glucosidase
Source: MDPI journal article supplement (doi:10.3390/biology10101055), 2021-10-18
Supplement: s1 [file s1]

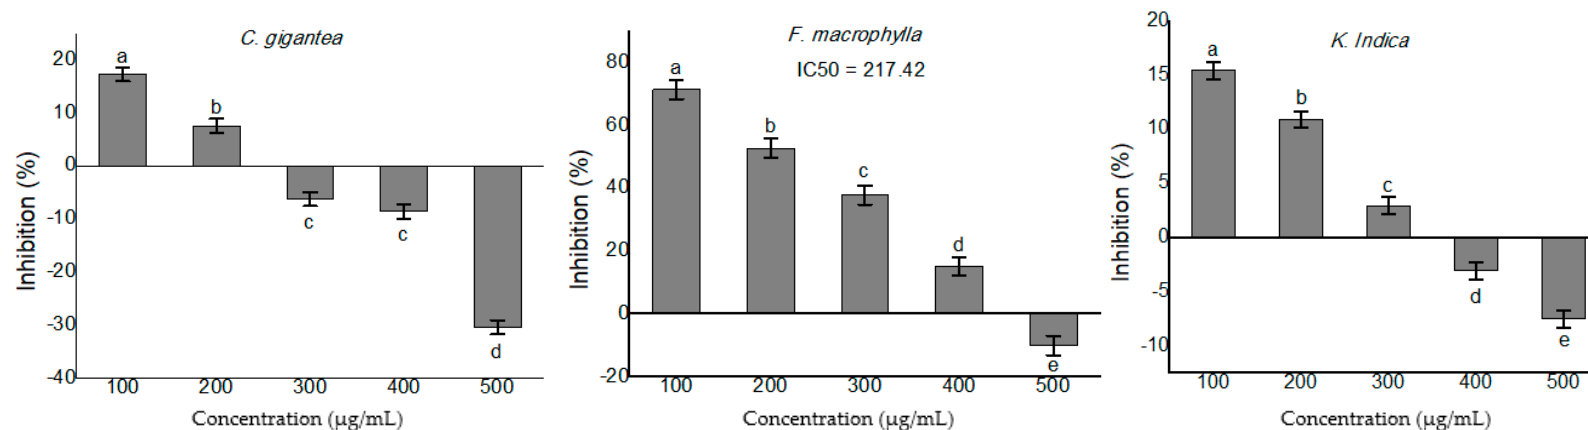

**Figure. S1:** Inhibition of  $\alpha$ -glucosidase activities by the extract of *C. gigantea*, *F. macrophylla*, and *K. indica*. The extracts of these plants produced unexpected results with the inhibition diminishing, even  $\alpha$ -glucosidase activity increasing, when the extract dose increased. Only the extract of *F. macrophylla* (leaves) had calculated IC<sub>50</sub> value. The extracts of *Portulaca Oleracea* and *Flemingia macrophylla* (roots) samples were not tested as they were lost. Means with different lower-case letters on the same graph differ ( $P < 0.05$ ).
